# Supplementary material
Source: publisher figshare collection journal article supplement (https://acs.figshare.com/ndownloader/files/4050217)
Supplement: Supplementary file 1 [file 4050217]

## Supporting Information

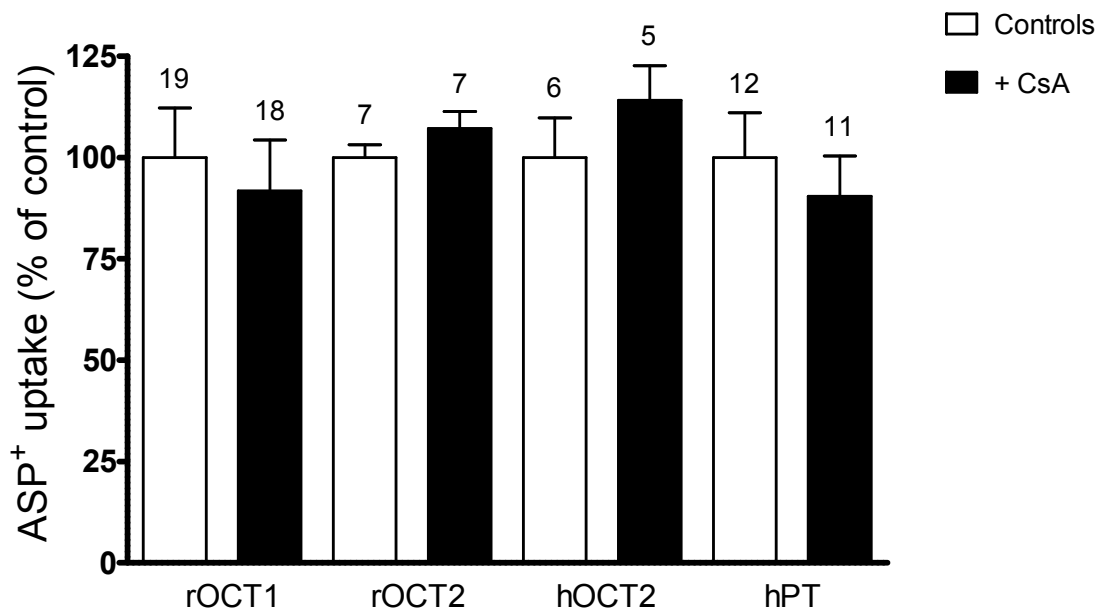

Supporting Information, Figure 1: This figure shows the acute influence of 10  $\mu\text{M}$  CsA on the uptake of 1  $\mu\text{M}$   $\text{ASP}^+$  in HEK293 cells stably transfected with rOCT1, rOCT2 or hOCT2 and also in freshly isolated human proximal tubules (hPT). No significant effect of CsA could be observed. Above the columns is the number of experiments.
